# Supplementary material for: Epigenetic loss of the endoplasmic reticulum–associated degradation inhibitor SVIP induces cancer cell metabolic reprogramming
Source: JCI journal article supplement (doi:10.1172/jci.insight.125888), 2019-03-07
Supplement: sd1 [file 1]

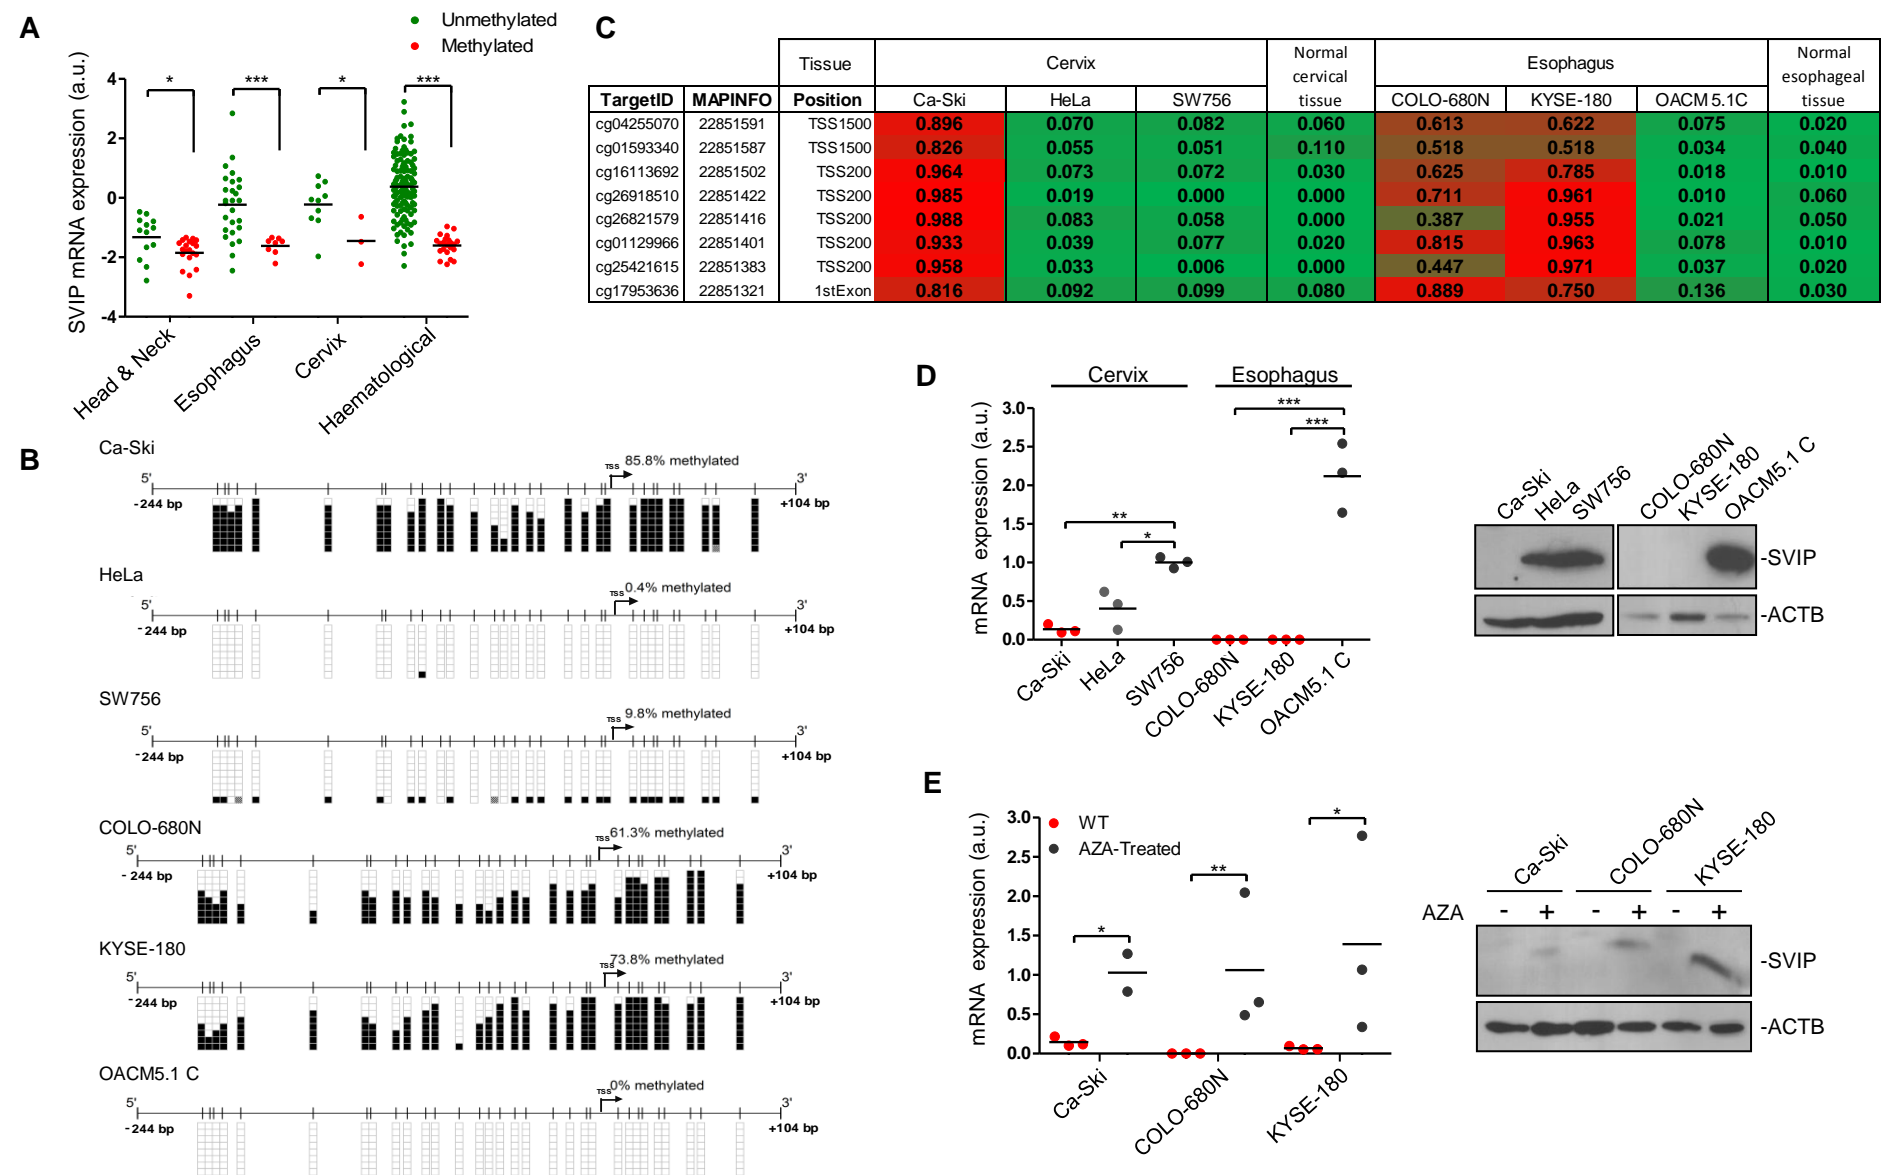

**Supplemental Figure 1. Transcriptional silencing of *SVIP* by promoter CpG island hypermethylation in cervical and esophageal cancer cells.** (A) *SVIP* expression analysis in head & neck, esophagus, cervix and haematological cell lines. A non-parametric Mann Whitney test was performed. (B) Bisulfite genomic sequencing of *SVIP* promoter CpG island in the studied cervical and esophageal cancer cells lines. CpG dinucleotides are represented as short vertical lines and the transcription start site (TSS) is represented as a long black arrow. Single clones are shown for each sample. Presence of an unmethylated or methylated cytosine is indicated by a white or black square, respectively. (C) DNA methylation profile of the CpG island promoter for the *SVIP* gene analyzed by the 450K DNA methylation microarray. Single CpG absolute methylation levels (0 – 1) are shown. Green, unmethylated; red, methylated. Data from three cervical (Ca-Ski, HeLa and SW756), three esophageal (COLO-680N, KYSE-180 and OACM 5.1C), normal cervical tissue and normal esophageal tissue are shown. (D) *SVIP* expression levels in cervical and esophageal cancer cell lines determined by real-time PCR (data shown represent mean of biological replicates) (left) and western blot (right). (E) Expression of the *SVIP* RNA transcript (data shown represent the mean of biological replicates) (left) and protein (right) was restored in the *SVIP* epigenetically silent Ca-Ski, COLO-680N and KYSE-180 cells by treatment with the demethylating drug 5-aza-2'-deoxycytidine (AZA). qPCRs were analysed using a two tailed Student's t-test. \* $P < 0.05$ , \*\* $P < 0.01$ , \*\*\* $P < 0.001$ .

**A**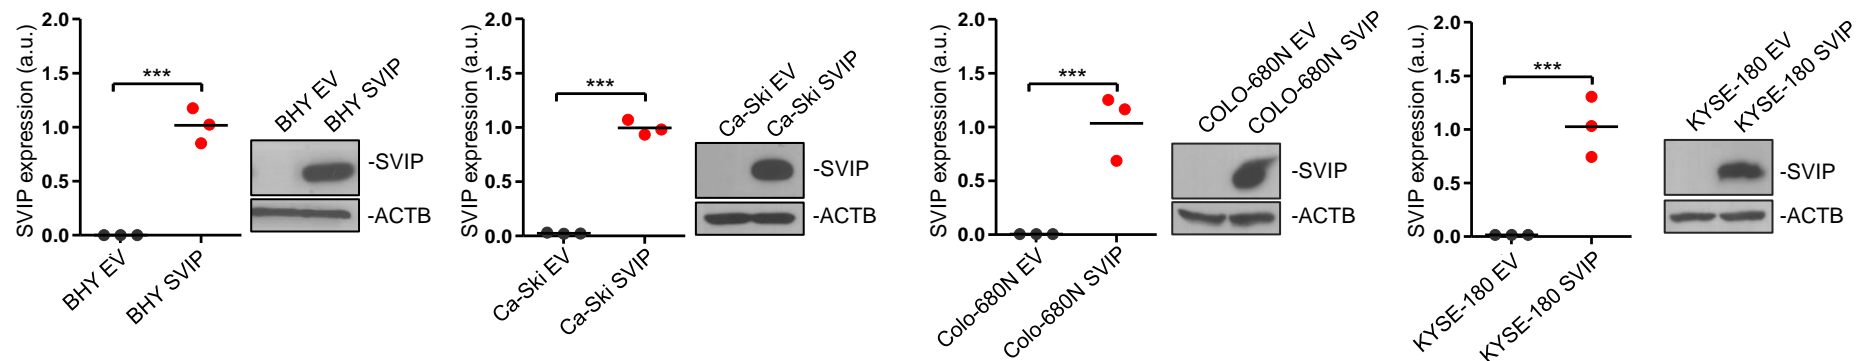**B**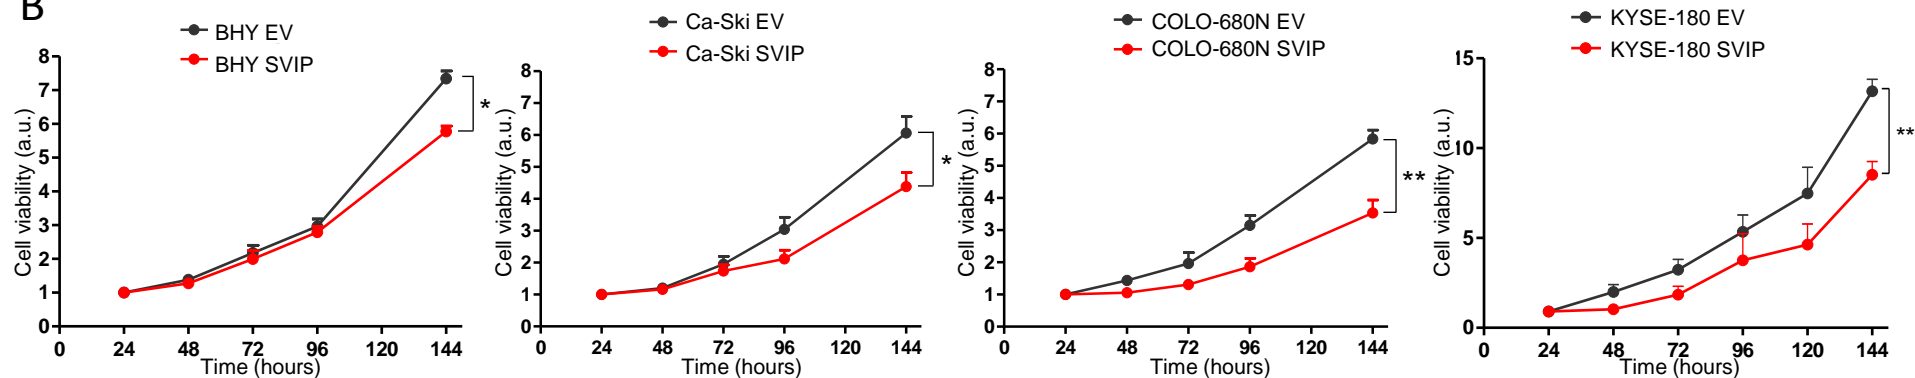**C**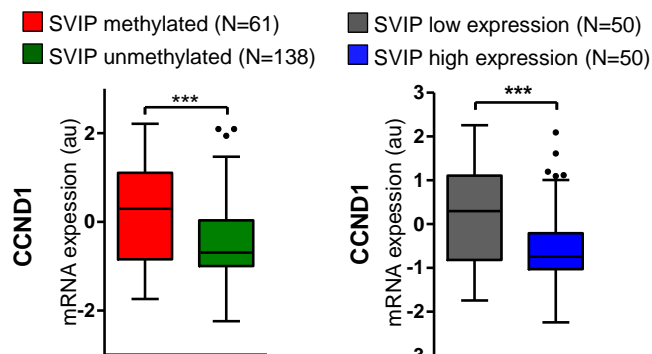**D**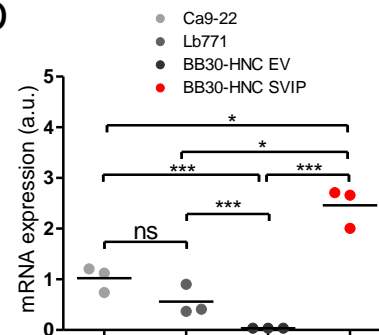

**Supplemental Figure 2. Efficient restoration of SVIP in other cell lines.** SVIP recovery upon transfection in BHY (head and neck cancer), Ca-Ski (cervical cancer), COLO-680N (esophageal cancer) and KYSE-180 (esophageal cancer) cancer cell lines was validated by (A) qRT-PCR (biological replicates are shown, statistical analysis was performed using a two-sided Student's t test) and Western blot (images are representative of at least three different assays). (B) Cell viability was determined by SRB assay (graphs are representative of three independent experiments; statistical analysis was performed by comparing mean endpoints using two-tailed (C) In silico correlation of the expression of the cell cycle marker cyclin D1 depending on SVIP methylation and expression status in head and neck, esophageal, cervix and haematological cell lines. Samples whose SVIP expression was lower than the first quartile were considered "SVIP low", whereas samples with SVIP expression levels higher than the third quartile were considered "SVIP high". Two-tailed U-Mann Whitney test was performed to compare mRNA expression between the groups of cell lines and TCGA samples. (D) Comparison of the magnitude of SVIP overexpression in BB30-HNC cell line compared with two unmethylated cell lines, Ca9-22 and Lb771 by qPCR. \*P < 0.05, \*\*P < 0.01, \*\*\*P < 0.001.

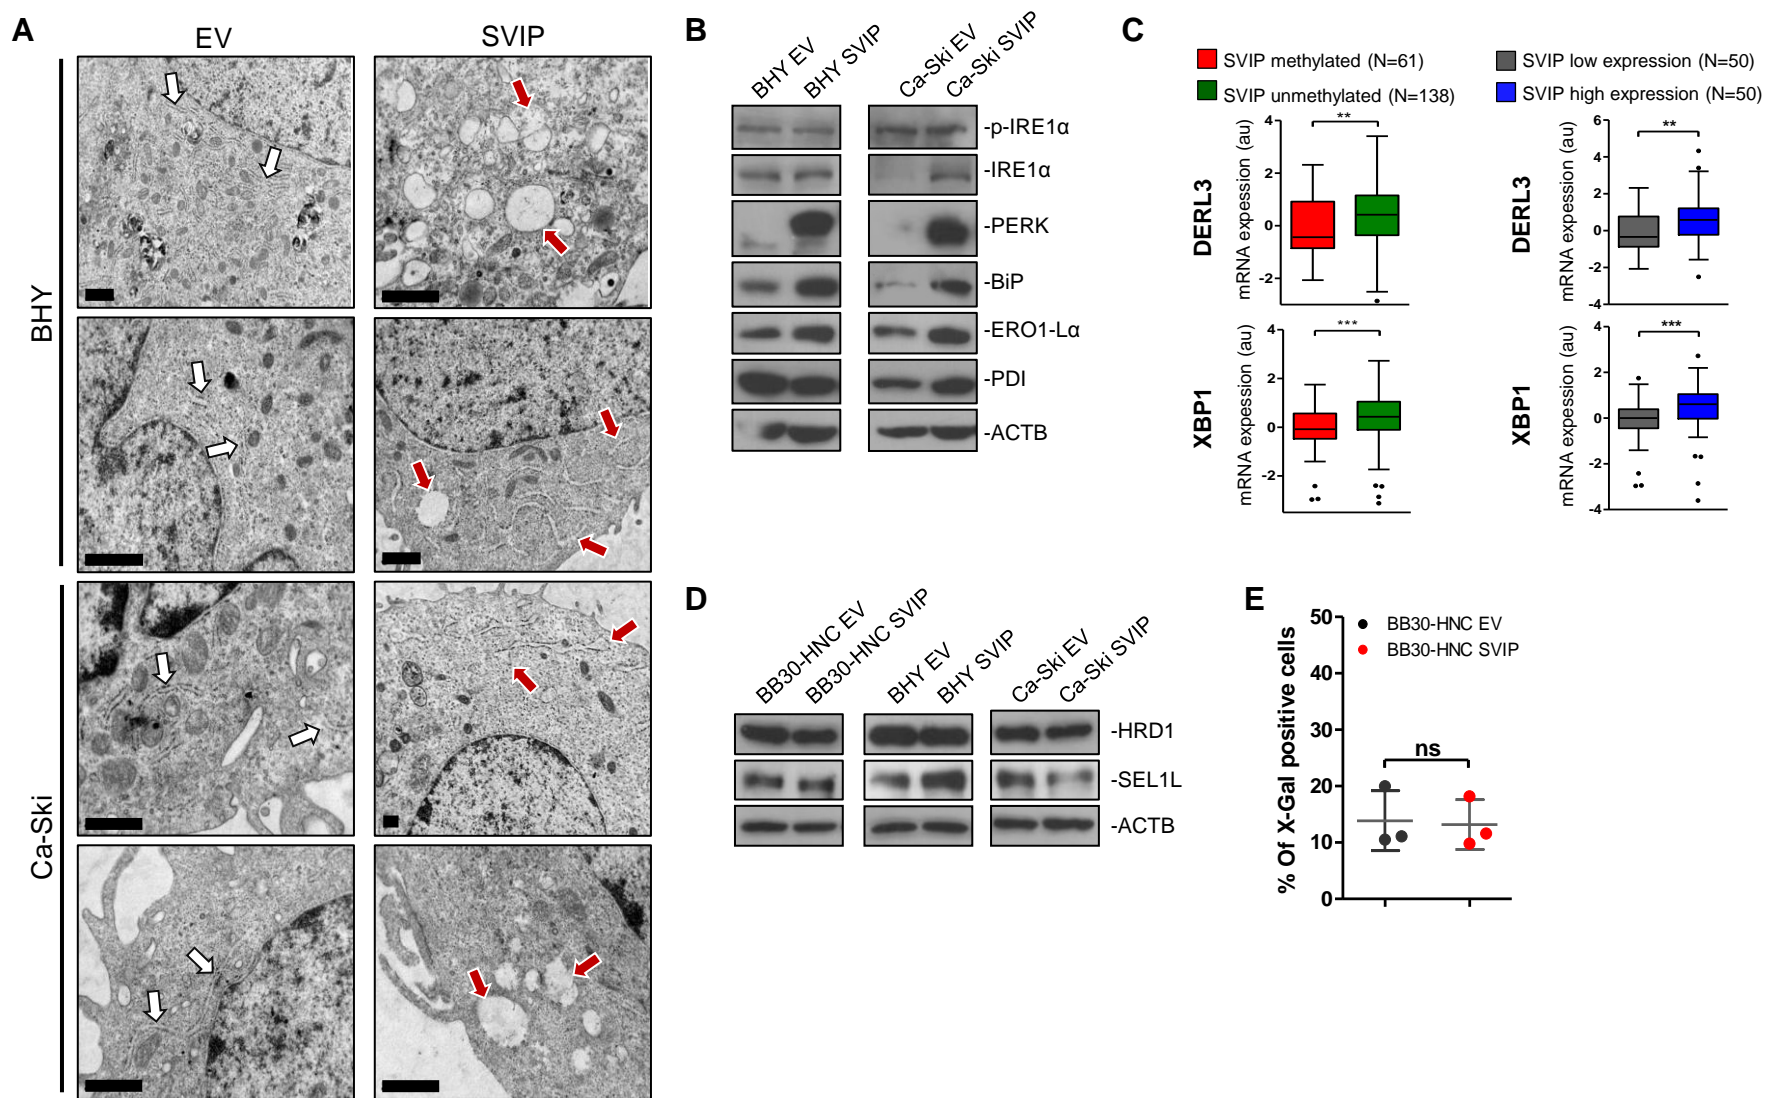

**Supplemental Figure 3. Restoration of SVIP expression does not alter the expression of other proteins involved in ERAD machinery and also recapitulates the ER stress situation in BHY and Ca-Ski cell lines.** (A) Electron microscopy images of empty vector-transfected and SVIP-expressing BHY and Ca-Ski cell lines. All scale bars represent 1 $\mu$ m. (B) Representative western blots of various proteins associated to UPR and protein folding in the ER after SVIP recovery in BHY and Ca-Ski cells. (C) In silico correlation of the expression of three ER-related proteins (AMFR, DERL3 and XBP1) depending on SVIP methylation and expression status in head and neck, esophageal, cervix and haematological cell lines and in head & neck TCGA cohort. Samples whose SVIP expression was lower than the first quartile were considered "SVIP low", whereas samples with SVIP expression levels higher than the third quartile were considered "SVIP high". Two-tailed U-Mann Whitney test was performed to compare mRNA expression between the groups of cell lines and TCGA samples. (D) Representative western blot of proteins involved in ERAD process after SVIP recovery in BB30-HNC, BHY and Ca-Ski cell lines. All western blots in B and D were performed in triplicate. (E) % of  $\beta$ -galactosidase-expressing cells in EV- and SVIP-transfected BB30-HNC cells. Statistical differences were determined using a two-sided Student's t test.

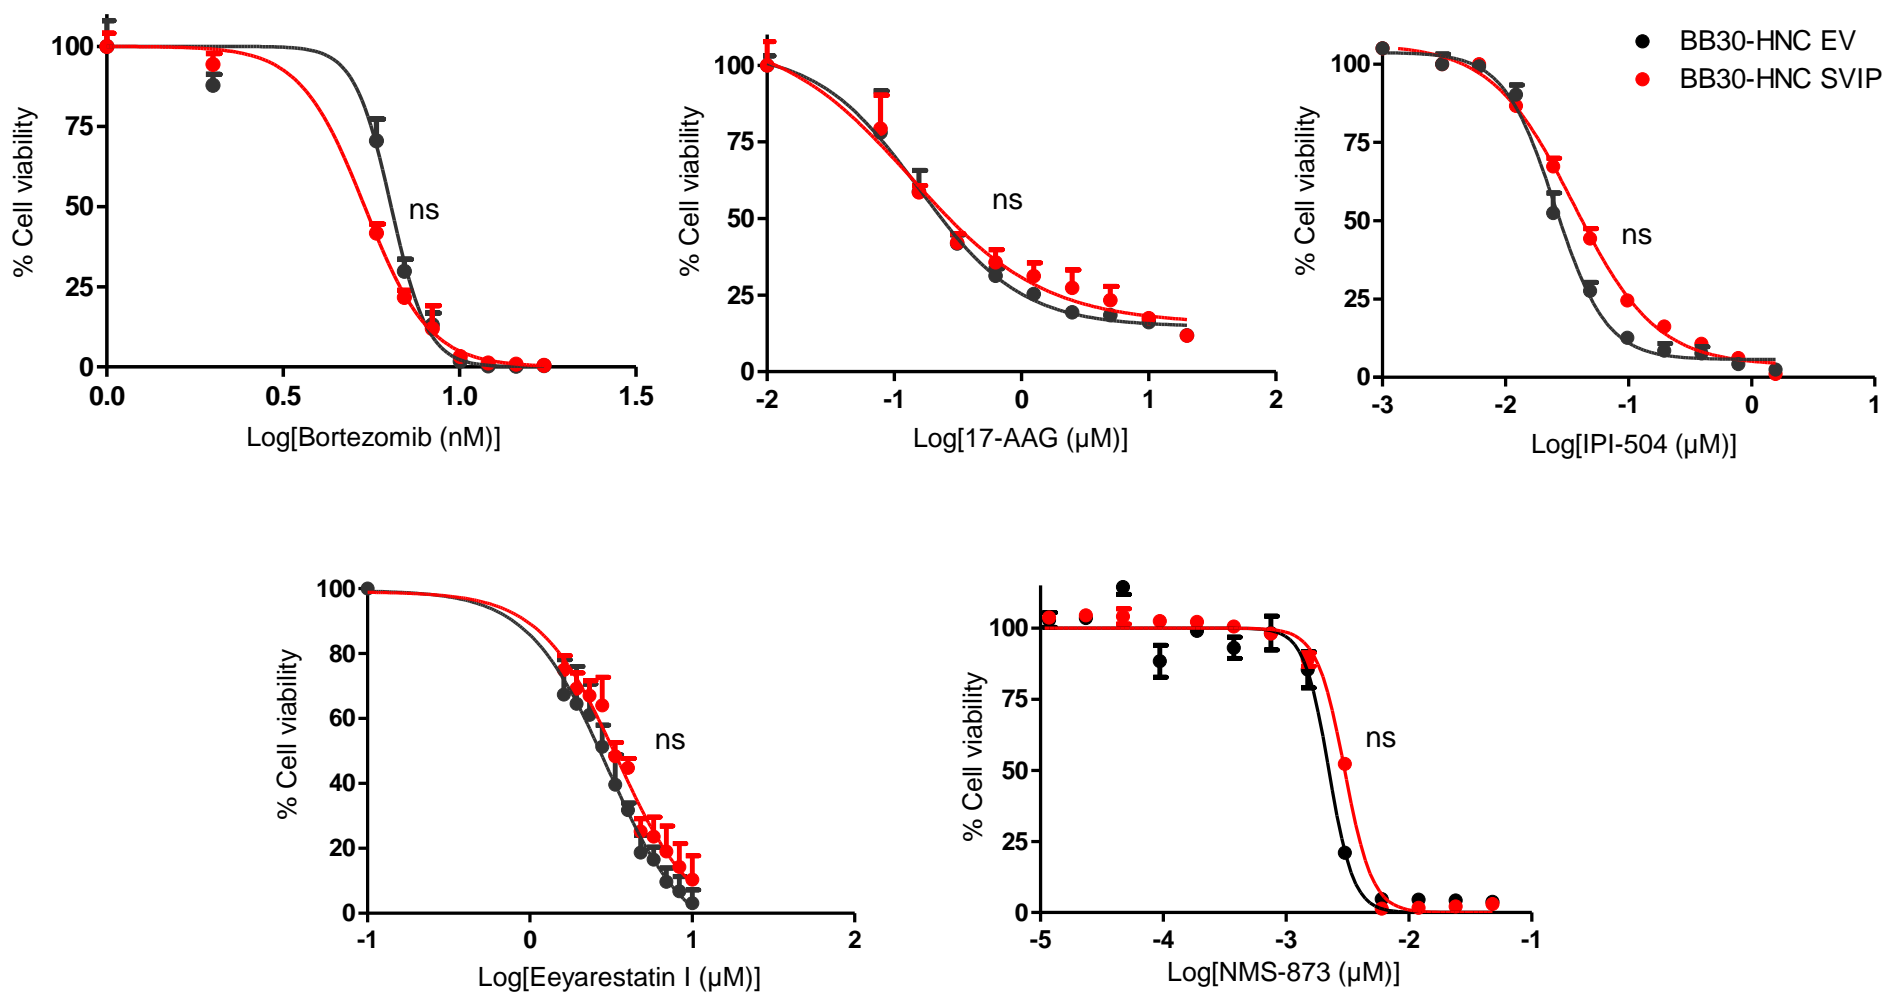

**Supplemental Figure 4. ER-related drugs testing on BB30-HNC model.** Determination of growth inhibitory effect by the SRB assay in empty vector and SVIP- transfected BB30-HNC cells upon treatment with Bortezomib, 17-AAG, IPI-504, Eeyarestatin I and NMS-873. All assays were performed in triplicate. Graphs are representative of the experiments. Statistical differences were determined by adjusting the curve to a third grade polynomial equation followed by extra sum of squares F-test. ns, no significant.

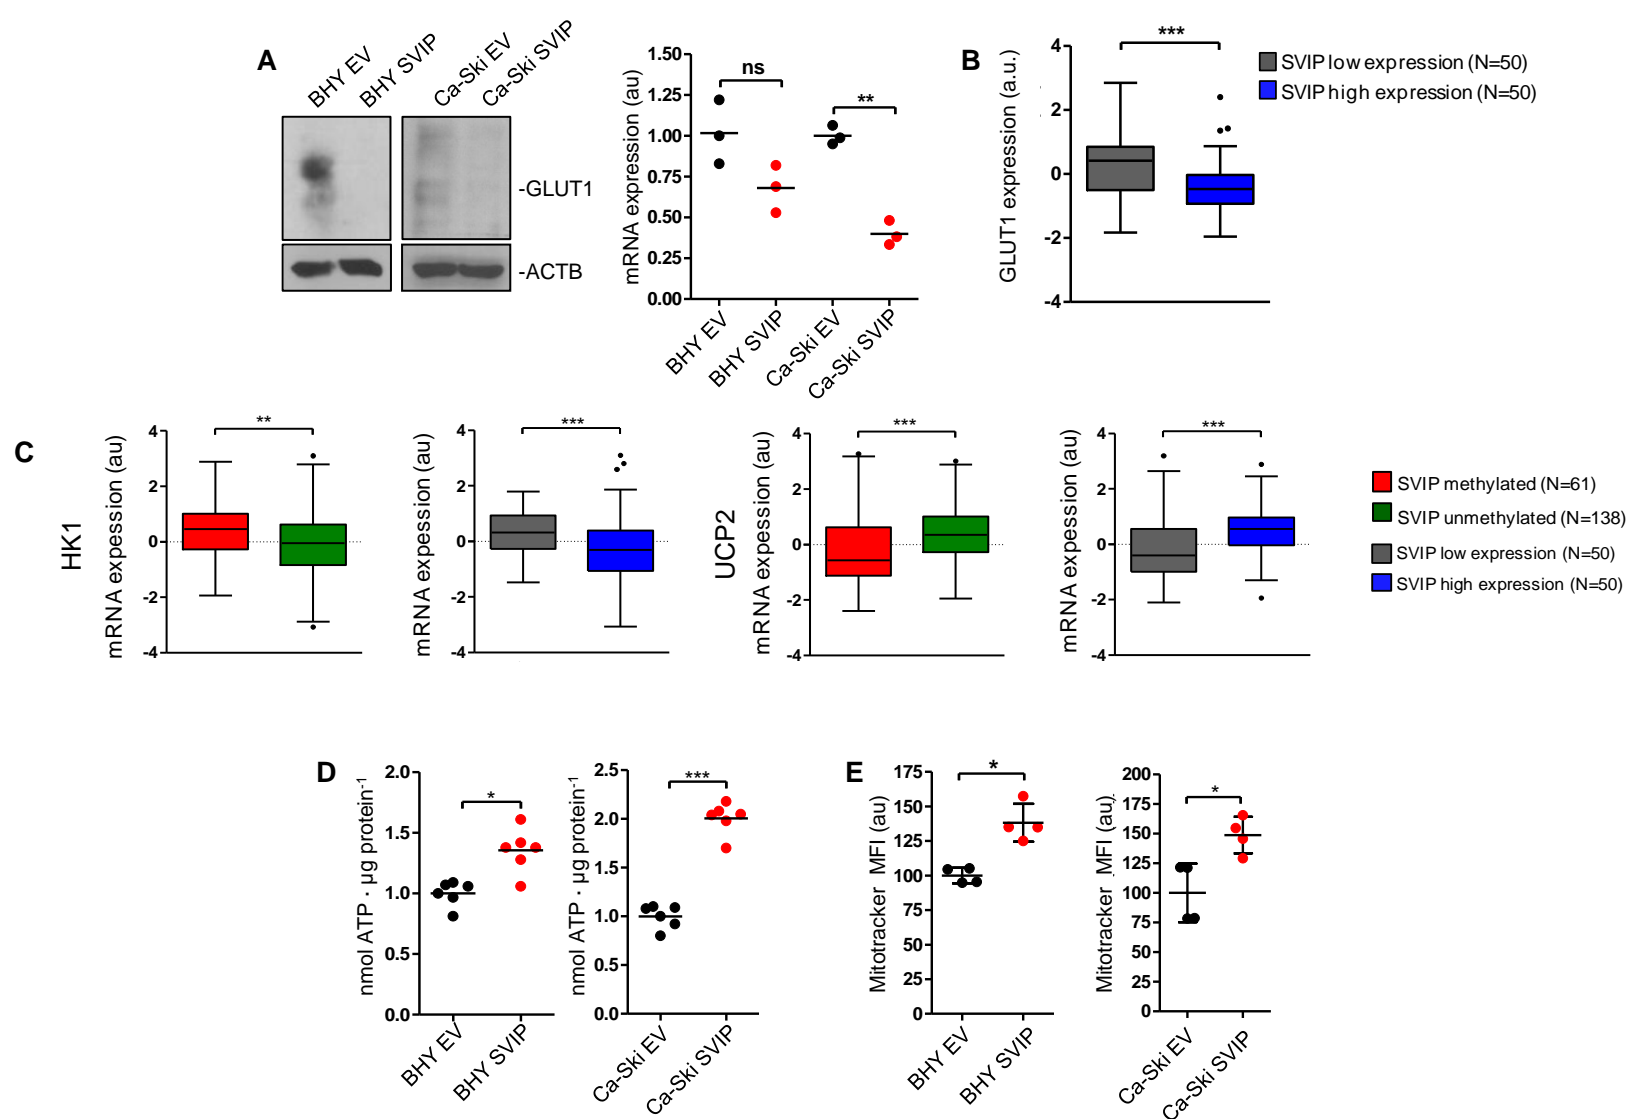

**Supplemental Figure 5. Metabolic consequences of SVIP recovery in BHY and Ca-Ski cancer cell lines.** (A) Western blot of GLUT1 in empty vector and SVIP-restored BHY and Ca-Ski cell lines. (B) SVIP mRNA expression significantly anticorrelates with GLUT1 mRNA expression in HNC, esophagus, cervix and haematological cell lines (N=118). SVIP expression was considered low when the when it was lower or equal than the first quartile, while SVIP expression was considered high when it was equal or higher than the third quartile. Expression was compared using a two-sided Mann-Whitney test. (C) In silico correlation of the expression of three metabolism-related proteins (HK1 and UCP2) depending on SVIP methylation and expression status in head and neck, esophageal, cervix and haematological cell lines and in head & neck TCGA cohort. Samples whose SVIP expression was lower than the first quartile were considered "SVIP low", whereas samples with SVIP expression levels higher than the third quartile were considered "SVIP high". Two-tailed U-Mann Whitney test was performed to compare mRNA expression between the groups of cell lines and TCGA samples. (D) ATP production in BHY and Ca-Ski cell lines upon SVIP transfection. Data were firstly normalized against protein amount, and then relativized against EV. Graph is representative of three independent experiments. Values are represented as mean of six replicates. Statistical differences have been reported using two-sided Student's t-test. (E) Mito Tracker median fluorescence intensity (MFI) was determined by flow cytometry. Mean SD of representative experiments is shown. (G). \*P<0.05, \*\*P<0.01, \*\*\*P<0.001, ns no significant.

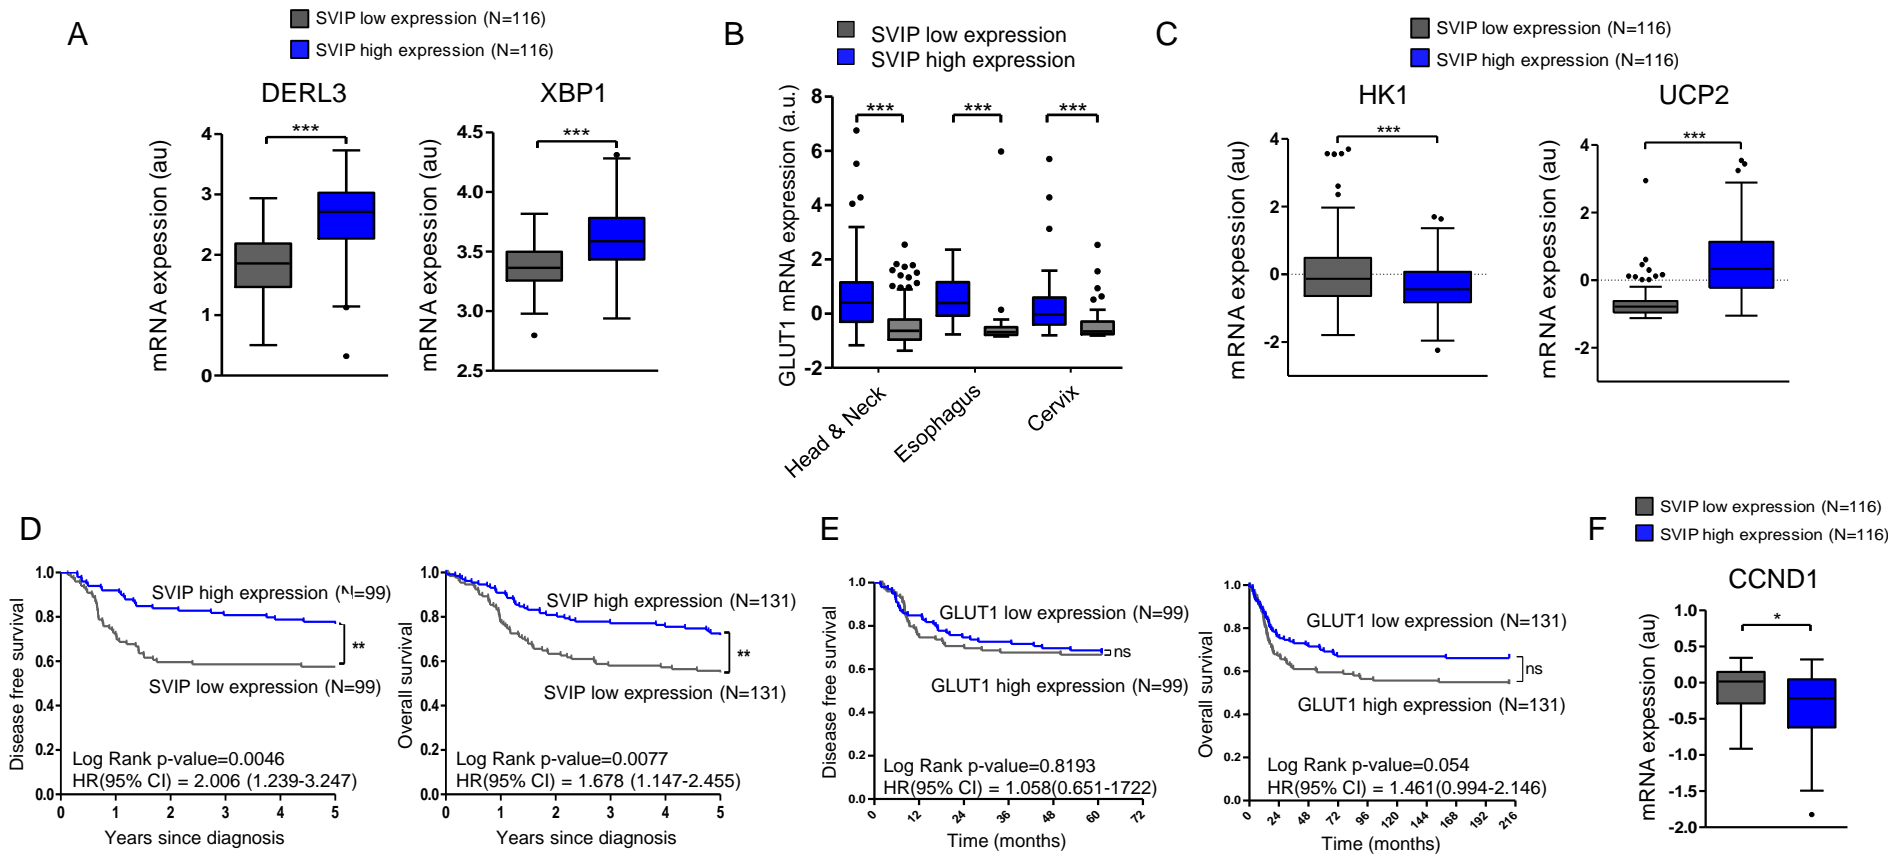

**Supplemental figure 6. SVIP epigenetically-deficient head & neck TCGA tumors recapitulate the phenotype observed in SVIP-recovered cell lines.** (A) In silico correlation of the expression of *XBP1* and *DERL3* depending on SVIP expression status in head & neck TCGA cohort. (B) GLUT1 expression analysis in head and neck, esophageal and cervical TCGA samples depending on SVIP expression levels. (C) In silico correlation of the expression of *HK1* and *UCP2* depending on SVIP expression status in head & neck TCGA cohort. (D) Kaplan Meier analysis of disease free survival (left) and overall survival (right) considering SVIP expression in head and neck primary tumors of the TCGA data set. P- value corresponds to log rank test. Results of univariate Cox regression analysis are shown by hazard ratio (HR) and 95% confidence interval (CI). (E) Kaplan Meier analysis of disease free survival (left) and overall survival (right) considering GLUT1 expression in head and neck primary tumors of the TCGA data set. P- value corresponds to log rank test. Results of univariate Cox regression analysis are shown by hazard ratio (HR) and 95% confidence interval (CI). (F) In silico correlation of the expression of *CCND1* depending on SVIP expression status in head & neck TCGA cohort. Samples in all panels were divided in quartiles according to SVIP or GLUT1 expression. Samples whose SVIP/GLUT1 expression was lower than the first quartile were considered “low”, whereas samples with expression levels higher than the third quartile were considered “high. Two-tailed U-Mann Whitney test was performed to compare gene expression between the studied groups of cell lines and TCGA samples. \*P<0.05, \*\*P<0.01, \*\*\*P<0.001, ns no significant.

**Supplementary Table 1:** List of differentially expressed proteins represented for at least two peptides in SILAC analysis upon SVIP transfection in BB30-HNC cells.

**A. Upregulated upon SVIP overexpression**

| ID Gene  | Fold change | p-value    |
|----------|-------------|------------|
| FXR1     | 32.1428571  | 0.0299974  |
| DHCR7    | 15.1020408  | 1.6286E-05 |
| RTCA     | 12.8333333  | 0.04864284 |
| VIM      | 10.617284   | 0.04760836 |
| CNN3     | 10.1557632  | 0.02364341 |
| HMGCS1   | 8.80090498  | 0.003165   |
| LPCAT1   | 7.62942779  | 0.04977868 |
| COPS8    | 7.34375     | 0.04210733 |
| AP3S1    | 7.26744186  | 0.0199053  |
| ABCD3    | 6.91333982  | 0.03893685 |
| SLC25A24 | 6.82983683  | 0.04516253 |
| CAT      | 5.85714286  | 0.00127963 |
| PAIP1    | 5.55555556  | 0.0228933  |
| VAT1     | 5.52857143  | 0.00319767 |
| DNM2     | 5.37634409  | 0.04575119 |
| IDH1     | 5.20661157  | 0.03582669 |
| ITGA2    | 5.10416667  | 0.04200355 |
| TARS     | 5.03846154  | 0.04664995 |
| CTTN     | 4.95495495  | 0.02048994 |
| ACAT2    | 4.60063898  | 0.00282376 |
| RBM12    | 4.57142857  | 0.00441503 |
| EIF2AK2  | 4.50980392  | 0.04177745 |
| ERAP1    | 4.48514851  | 0.04793058 |
| DCDC5    | 4.47368421  | 0.01507317 |
| OSBP     | 4.44444444  | 0.01913367 |
| S100A13  | 4.41176471  | 0.04020444 |
| PPP2R2A  | 4.375       | 0.00362953 |
| TKT      | 4.21232877  | 0.01032101 |
| DDAH1    | 4.20588235  | 0.02980616 |
| CYB5A    | 4.12612613  | 0.02691284 |
| CUL4B    | 4.07619048  | 0.03584337 |
| GDI1     | 3.93364929  | 0.02618891 |
| PRKCDBP  | 3.92215569  | 0.01801815 |
| PGM1     | 3.84615385  | 0.02005603 |
| BASP1    | 3.70588235  | 0.00228101 |
| SUB1     | 3.66666667  | 0.01454491 |
| RRM2     | 3.6         | 0.00576178 |
| G6PD     | 3.47692308  | 0.01762289 |
| DTD1     | 3.4502924   | 0.03773559 |
| MCTS1    | 3.4351145   | 0.0028799  |



| ID Gene  | Fold change | p-value    |
|----------|-------------|------------|
| OGFR     | 3.42857143  | 0.04988295 |
| PDIA6    | 3.41463415  | 0.01552488 |
| KRT8     | 3.36585366  | 0.03671742 |
| SUCLG2   | 3.34650856  | 0.01987182 |
| GNAS     | 3.34117647  | 0.01566528 |
| AKR1C1   | 3.32653061  | 0.04096684 |
| RAB10    | 3.27058824  | 0.04417397 |
| MTHFD1   | 3.25203252  | 0.01294349 |
| RNPS1    | 3.24817518  | 0.03883771 |
| ADIRF    | 3.22988506  | 0.01315107 |
| GNB2     | 3.2183908   | 0.00195006 |
| APEX1    | 3.2173913   | 0.01636789 |
| NDUFB11  | 3.20512821  | 0.01195103 |
| DENR     | 3.18181818  | 0.006425   |
| PDPN     | 3.16363636  | 0.03425198 |
| HADHB    | 3.08457711  | 0.04654997 |
| UGDH     | 3.03478261  | 0.01298571 |
| NUDT5    | 3.02325581  | 0.00117976 |
| PSMF1    | 2.97752809  | 0.00378019 |
| SLC25A5  | 2.96482412  | 0.01368587 |
| MVP      | 2.92517007  | 0.03508987 |
| GNAI2    | 2.92307692  | 0.00454258 |
| APP      | 2.91727141  | 0.01900122 |
| CORO1C   | 2.87096774  | 0.01134609 |
| AKR1B1   | 2.85714286  | 0.03850582 |
| LTA4H    | 2.84415584  | 0.03016842 |
| PAFAH1B3 | 2.77966102  | 0.0310627  |
| ACSL3    | 2.76960784  | 0.02925421 |
| VCL      | 2.75630252  | 0.04905471 |
| S100A6   | 2.7480916   | 0.00856122 |
| SLC25A22 | 2.73737374  | 0.0198122  |
| PGK1     | 2.72857143  | 0.04693298 |
| CD82     | 2.72821577  | 0.0367791  |
| MARS     | 2.7027027   | 0.0370125  |
| HIBADH   | 2.68421053  | 0.00494985 |
| MT-CO2   | 2.67409471  | 0.04651879 |
| DDX1     | 2.62626263  | 0.03135003 |
| ERP29    | 2.62365591  | 0.03317915 |
| MAPRE1   | 2.59722222  | 0.00459747 |
| APEH     | 2.5748503   | 0.00782955 |
| AIFM1    | 2.57425743  | 0.02232868 |
| KIF5B    | 2.5462963   | 0.02511471 |
| NUMA1    | 2.5         | 0.02771502 |
| PFKFB2   | 2.48863636  | 0.0479245  |
| ECI1     | 2.47191011  | 0.01217441 |



| ID Gene | Fold change | p-value    |
|---------|-------------|------------|
| PREP    | 2.46808511  | 4.0259E-05 |
| RALY    | 2.46153846  | 0.03930777 |
| MBOAT7  | 2.45901639  | 0.039528   |
| YBX3    | 2.42105263  | 0.02324571 |
| PRDX5   | 2.4137931   | 0.00031503 |
| GSTO1   | 2.36538462  | 0.04432432 |
| CLNS1A  | 2.35443038  | 0.04334824 |
| HADHA   | 2.32365145  | 0.00628803 |
| SRI     | 2.31944444  | 0.01029654 |
| ARHGAP1 | 2.31428571  | 0.00012989 |
| TM9SF4  | 2.29885057  | 0.04998547 |
| AARS    | 2.29032258  | 0.0073872  |
| APMAP   | 2.28571429  | 0.00265961 |
| RAB6C   | 2.25663717  | 0.04348661 |
| ARPC2   | 2.24489796  | 0.03437383 |
| RBBP4   | 2.17898833  | 0.04339225 |
| TSPO    | 2.17333333  | 0.03546801 |
| CLIC4   | 2.1541502   | 0.0188887  |
| SARS    | 2.15        | 0.03363727 |
| PRDX6   | 2.12765957  | 0.03805794 |
| NUDT21  | 2.10918114  | 0.04786461 |
| PKP1    | 2.09146341  | 0.03078166 |
| RAVER1  | 2.06293706  | 0.04912038 |
| CDC37   | 2.05555556  | 0.03594591 |
| EIF1    | 2.05417607  | 0.02626985 |

## B. Downregulated upon SVIP overexpression

| ID Gene | Fold change | p-value    |
|---------|-------------|------------|
| SIX5    | 0.02891892  | 0.02429929 |
| TYMP    | 0.03857143  | 0.01735944 |
| GSTP1   | 0.0401626   | 0.04078133 |
| HSPB1   | 0.04258065  | 0.01581999 |
| HLA-C   | 0.05031447  | 0.04112482 |
| HLA-B   | 0.26961326  | 0.02763397 |
| BICD2   | 0.27108434  | 0.00847096 |
| ETFA    | 0.34016393  | 0.04288903 |
| ETFB    | 0.35632184  | 0.00542287 |
| APRT    | 0.36363636  | 0.04489244 |
| ARPC5L  | 0.37623762  | 0.04469599 |
| CLTB    | 0.38888889  | 0.04566731 |
| PC      | 0.41958763  | 0.04420214 |
| SLC2A1  | 0.46545455  | 0.0214964  |

**Supplementary Table 2:** Association between clinicopathological characteristics and SVIP methylation status in the TCGA head & neck squamous cell carcinoma cohort.

| CHARACTERISTICS                   |                             | SVIP methylation status |                       |                     | P*        |
|-----------------------------------|-----------------------------|-------------------------|-----------------------|---------------------|-----------|
|                                   |                             | N (%)                   | Unmethylated<br>N (%) | Methylated<br>N (%) |           |
| <b>Age (years)</b>                |                             |                         |                       |                     |           |
|                                   | < 50                        | 48 (17%)                | 32 (67%)              | 16 (33%)            | 0.264     |
|                                   | > 50                        | 234 (83%)               | 135 (58%)             | 99 (42%)            |           |
| <b>Gender</b>                     |                             |                         |                       |                     |           |
|                                   | Male                        | 200 (71%)               | 130 (65%)             | 70 (35%)            | 0.003**   |
|                                   | Female                      | 82 (29%)                | 37 (45%)              | 45 (55%)            |           |
| <b>Disease stage at diagnosis</b> |                             |                         |                       |                     |           |
|                                   | I                           | 11 (4%)                 | 7 (64%)               | 4 (36%)             | 0.207     |
|                                   | II                          | 55 (19%)                | 27 (49%)              | 28 (51%)            |           |
|                                   | III                         | 67 (24%)                | 37 (55%)              | 30 (45%)            |           |
|                                   | IV                          | 136 (48%)               | 88 (65%)              | 48 (35%)            |           |
|                                   | Unknown                     | 13 (5%)                 | 8 (62%)               | 5 (38%)             |           |
| <b>Tumor site</b>                 |                             |                         |                       |                     |           |
|                                   | Oral cavity                 | 104 (37%)               | 41 (39%)              | 63 (61%)            | <0.001*** |
|                                   | Tongue                      | 92 (33%)                | 55 (60%)              | 37 (40%)            |           |
|                                   | Tonsil                      | 16 (6%)                 | 15 (94%)              | 1 (6%)              |           |
|                                   | Pharynx                     | 10 (4%)                 | 9 (90%)               | 1 (10%)             |           |
|                                   | Larynx                      | 59 (21%)                | 47 (80%)              | 12 (20%)            |           |
|                                   | Unknown                     | 1 (1%)                  | 0 (0%)                | 1 (100%)            |           |
| <b>Smoking habit</b>              |                             |                         |                       |                     |           |
|                                   | Current / Former smoker     | 15 (5%)                 | 7 (47%)               | 8 (53%)             | 0.287     |
|                                   | Never smoker                | 185 (66%)               | 109 (59%)             | 76 (41%)            |           |
|                                   | Unknown                     | 82 (29%)                | 51 (62%)              | 31 (38%)            |           |
| <b>Drinking habits</b>            |                             |                         |                       |                     |           |
|                                   | Yes                         | 177 (63%)               | 114 (64%)             | 63 (36%)            | 0.031*    |
|                                   | No                          | 100 (35%)               | 51 (51%)              | 49 (49%)            |           |
|                                   | Unknown                     | 5 (2%)                  | 2 (40%)               | 3 (60%)             |           |
| <b>HPV status</b>                 |                             |                         |                       |                     |           |
|                                   | Negative                    | 49 (17%)                | 37 (75%)              | 12 (25%)            | 0.358     |
|                                   | Positive                    | 23 (8%)                 | 20 (87%)              | 3 (13%)             |           |
|                                   | Unknown                     | 210 (75%)               | 110 (52%)             | 100 (48%)           |           |
| <b>Treatment strategy</b>         |                             |                         |                       |                     |           |
|                                   | Surgery                     | 94 (34%)                | 55 (58%)              | 39 (42%)            | 0.096     |
|                                   | Chemotherapy                | 40 (14%)                | 31 (12%)              | 9 (23%)             |           |
|                                   | Radiotherapy                | 32 (11%)                | 22 (69%)              | 10 (31%)            |           |
|                                   | Unknown                     | 116 (41%)               | 59 (51%)              | 57 (49%)            |           |
| <b>Treatment outcome</b>          |                             |                         |                       |                     |           |
|                                   | Complete remission/Response | 171 (61%)               | 108 (63%)             | 63 (37%)            | 0.650     |
|                                   | Stable disease              | 7 (2%)                  | 5 (71%)               | 2 (29%)             |           |
|                                   | Progressive disease         | 44 (16%)                | 25 (57%)              | 19 (43%)            |           |
|                                   | Unknown                     | 60 (21%)                | 29 (48%)              | 31 (52%)            |           |
| <b>Survival status</b>            |                             |                         |                       |                     |           |
|                                   | Alive                       | 200 (71%)               | 127 (63%)             | 73 (37%)            | 0.024*    |
|                                   | Dead                        | 82 (29%)                | 40 (49%)              | 42 (51%)            |           |

\*P-value represents Fisher's exact test or Chi-square function whenever required: statistical significance under 0.05\*, 0.01\*\* and 0.001\*\*\*

# KEY RESOURCES TABLE

| REAGENT or RESOURCE                                  | SOURCE          | IDENTIFIER |
|------------------------------------------------------|-----------------|------------|
| <b>Antibodies</b>                                    |                 |            |
| SVIP                                                 | SIGMA           | HPA039807  |
| phospho-IRE1 $\alpha$ (Ser724)                       | Thermofisher    | PA1-16927  |
| p21                                                  | CST             | 2947       |
| eIF2 $\alpha$                                        | CST             | 5324       |
| phospho-eIF2 $\alpha$ (Ser51)                        | CST             | 3398       |
| SEL1L                                                | Abcam           | Ab78298    |
| SYVN1 (Hrd1)                                         | CST             | 14773      |
| IRE1 $\alpha$                                        | CST             | 14C10      |
| PERK                                                 | CST             | D11A8      |
| ERO1-L $\alpha$                                      | CST             | #3264      |
| PDI                                                  | CST             | C81H6      |
| BECLIN1                                              | CST             | D40C5      |
| p62/SQTM                                             | CST             | #5114      |
| LC3BI/II                                             | CST             | D3U4C      |
| PARP                                                 | BD Pharmingen   | 556362     |
| Caspase 3                                            | SCBT            | H-277      |
| HM13                                                 | Abcam           | ab190253   |
| REEP5                                                | SIGMA           | HPA003895  |
| CD82                                                 | Abcam           | ab66400    |
| NSDHL                                                | Abcam           | ab190353   |
| SLC25A5                                              | CST             | #14671     |
| SUCLG2                                               | Abcam           | ab96172    |
| NDUFB8 (CI)                                          | Abcam           | ab110411   |
| MTCO2 (CIV)                                          | Abcam           | ab110411   |
| SLC2A1                                               | CST             | D3J3A      |
| $\alpha$ Tubulin-HRP                                 | Abcam           | 40742      |
| LMNB1                                                | Abcam           | ab16048    |
| ACTB -HRP                                            | SIGMA           | A3854      |
| Anti-rabbit HRP                                      | SIGMA           | A0545      |
| Anti-mouse HRP                                       | GE HEALTHCARE   | NA9310     |
| <b>Bacterial and Virus Strains</b>                   |                 |            |
| <i>E. coli</i> DH5 $\alpha$                          | Thermofisher    | 18265017   |
| Lentivirus produced with PsPPAX and PDM2 plasmids    | -               | -          |
| <b>Chemicals, Peptides, and Recombinant Proteins</b> |                 |            |
| 5'-azacytidine                                       | SIGMA           | A2385      |
| Sulforhodamine B                                     | SIGMA           | S1402      |
| Polyethylene glycol 300                              | SIGMA           | 90878-1L   |
| NMP                                                  | SIGMA           | 494496-1L  |
| GoScript                                             | Promega         | A5001      |
| Sybr green                                           | Thermofisher    | 4312704    |
| jetPrime polyplus                                    | Polyplus        | Ref114     |
| Bortezomib                                           | LC laboratories | B-1408     |
| Eeyarestatin I                                       | SIGMA           | E1286      |
| 17-AAG                                               | SIGMA           | A8476      |
| IPI-504                                              | Medchem         | HY-10210   |
| Thapsigargin                                         | SIGMA           | T9033      |
| SILAC-Lys8-Arg10-Kit media                           | SILANTES        | 282986444  |
| Bay-876                                              | Sigma           | SML1774    |
| NMS-873                                              | MedChemExpress  | HY-15713   |

|                                                 |               |             |
|-------------------------------------------------|---------------|-------------|
| Oligomycin                                      | SIGMA         | 75351       |
| FCCP                                            | SIGMA         | C2920       |
| Rotenone A                                      | SIGMA         | R8875       |
| Antimycin A                                     | SIGMA         | A8674       |
| Hydrazine                                       | Sigma         | 53847       |
| NAD+                                            | Roche - Sigma | 10127990001 |
| LDH                                             | Roche - Sigma | 10107085001 |
| dATP                                            | NEBiolabs     | N0440S      |
| Mito Tracker                                    | Thermofisher  | M22426      |
| MitoSox                                         | Thermofisher  | M36008      |
| U- <sup>13</sup> C <sub>6</sub> labeled glucose | Sigma         | 389374      |

#### Critical Commercial Assays

|                                 |                 |            |
|---------------------------------|-----------------|------------|
| EZ-DNA methylation Gold Kit     | Zymo research   | D5006      |
| Nucleospin Gel and PCR Clean-up | Machery Nagel   | 740609.250 |
| Nucleospin 96 plasmid           | Machery Nagel   | 740625.24  |
| Maxwell RSC simply RNA tissue   | Promega         | AS1340     |
| Seahorse XF24 plates            | Agilent         | 100777-004 |
| DC protein assay                | BioRad          | 5000116    |
| Cell titer Glo                  | Promega         | G7571      |
| Glucose HK CP                   | ABX diagnostics | A11A01667  |

#### Experimental Models: Cell Lines

|            |        |           |
|------------|--------|-----------|
| BB30-HNC   | Sanger | CVCL_1076 |
| BHY        | DSMZ   | CVCL_1086 |
| Ca9-22     | Sanger | CVCL_1102 |
| LB-771     | Sanger | CVCL_1369 |
| Ca-Ski     | ATCC   | CVCL_1100 |
| HeLa       | ATCC   | CVCL_0030 |
| SW756      | ATCC   | CVCL_1727 |
| COLO-680N  | DSMZ   | CVCL_1131 |
| KYSE-180   | DSMZ   | CVCL_1349 |
| OACM 5.1 C | SIGMA  | 11012006  |
| HEK-293T   | ATCC   | CVCL_0063 |

#### Experimental Models: Organisms/Strains

|                 |        |
|-----------------|--------|
| NU/NU Nude Mice | INVIGO |
|-----------------|--------|

#### Oligonucleotides

|                                         |            |
|-----------------------------------------|------------|
| BS SVIP F TTTTGGGAATTTAGGTTTTGG         | This paper |
| BS SVIP R AAAAACACAACCCCATAAAAC         | This paper |
| Cloning SVIP S                          | This paper |
| AAAAAAAAGAATTCGCCGCCACCATGGGGCTGTGTT    |            |
| TTCCTTGTCCCGGGGAGTCCGCGCCTC             |            |
| Cloning SVIP AS                         | This paper |
| AAAAAAAAGGATCCTTACTTATCGTCGTCATCCTTGT   |            |
| AATCGCCGGAGCCTGAACTGTCCACCTAAGTCCA      |            |
| CCTTCTGGTGGGGGCCCGGATGTAGCAA            |            |
| sh1_SVIP S                              | This paper |
| gatccGACTTAGGTGGACAGTTTCTTCAAGAGAGAAA   |            |
| CTGTCCACCTAAGTCTTTTTTACGCGTg            |            |
| sh1_SVIP AS                             | This paper |
| aattcACGCGTAAAAAAGACTTAGGTGGACAGTTTCTC  |            |
| TCTTGAAGAACTGTCCACCTAAGTCg              |            |
| sh4_SVIP S                              | This paper |
| gatccGGCTAGACTTTTTCATTAAATTCAAGAGATTTAA |            |
| TGAAAAGTCTAGCCTTTTTTACGCGTg             |            |

|                                                                                                                                                                                                                                                                                                                                                                                                                                                                                                                                                                                                                                                                                                                                                                                                                                                                                                                                                                                                                                                   |                                                                                                                                                                                                                                                                                                                                                                                                                                                                                                                                                                                                                                                                                                                                                                                                                                                                                                                                                                                                                                                                                                                                                                                                                                                                                                                                                                                                                                                                                                                                                                                                                                                                                                                                                                                                                                                                                                                                                                                                                                                                                                                                                                                                                                                                                                                                                                                                                                                                                                                                                                                                                                                                                                                                                                                                                                                                                                                                                                                                                                                                                                                                                                                                                                                                                                                                                                                                                                                                                                                                                                                                                                                                                                                                                                                                                                                                                                                                                                                                                                                                                                                                                                                                                                                                                                                                                                                                                                                                                                                                                                                                                                                                                                                                                                                                                                                                                                                                                                                                                                                                                                                                                                                                                                                                                                                                                                                                                                                                                                                                                                                                                                                                                                                                                                                                                                                                                                                                                                                                                                                                                                                                                                                                                                                                                                                                                                                                                                                                                                                                                                                                                                                                                                                                                                                                                                                                                                                                                                                                                                                                                                                                                                                                                                                                                                                                                                                                                                                                                                                                                                                                                                                                                                                                                                                                                                                                                                                                                                                                                                                                                                                                                                                                                                                                                                                                                                                                                                                                                                                                                                                                                                                                                                                                                                                                                                                                                                                                                                                                                                                                                                                                                                                                                                                                                                                                                                                                                                                                                                                                                                                                                                                                                                                                                                                                                                                                                                                                                                                                                                                                                                                                                                                                                                                                                                                                                                                                                                                                                                                                                                                                                                                                                                                                                                                                                                                                                                                                                                                                                                                                                                                                                                                                                                                                                                                                                                                                                                                                                                                                                                                                                                                                                                |
|---------------------------------------------------------------------------------------------------------------------------------------------------------------------------------------------------------------------------------------------------------------------------------------------------------------------------------------------------------------------------------------------------------------------------------------------------------------------------------------------------------------------------------------------------------------------------------------------------------------------------------------------------------------------------------------------------------------------------------------------------------------------------------------------------------------------------------------------------------------------------------------------------------------------------------------------------------------------------------------------------------------------------------------------------|------------------------------------------------------------------------------------------------------------------------------------------------------------------------------------------------------------------------------------------------------------------------------------------------------------------------------------------------------------------------------------------------------------------------------------------------------------------------------------------------------------------------------------------------------------------------------------------------------------------------------------------------------------------------------------------------------------------------------------------------------------------------------------------------------------------------------------------------------------------------------------------------------------------------------------------------------------------------------------------------------------------------------------------------------------------------------------------------------------------------------------------------------------------------------------------------------------------------------------------------------------------------------------------------------------------------------------------------------------------------------------------------------------------------------------------------------------------------------------------------------------------------------------------------------------------------------------------------------------------------------------------------------------------------------------------------------------------------------------------------------------------------------------------------------------------------------------------------------------------------------------------------------------------------------------------------------------------------------------------------------------------------------------------------------------------------------------------------------------------------------------------------------------------------------------------------------------------------------------------------------------------------------------------------------------------------------------------------------------------------------------------------------------------------------------------------------------------------------------------------------------------------------------------------------------------------------------------------------------------------------------------------------------------------------------------------------------------------------------------------------------------------------------------------------------------------------------------------------------------------------------------------------------------------------------------------------------------------------------------------------------------------------------------------------------------------------------------------------------------------------------------------------------------------------------------------------------------------------------------------------------------------------------------------------------------------------------------------------------------------------------------------------------------------------------------------------------------------------------------------------------------------------------------------------------------------------------------------------------------------------------------------------------------------------------------------------------------------------------------------------------------------------------------------------------------------------------------------------------------------------------------------------------------------------------------------------------------------------------------------------------------------------------------------------------------------------------------------------------------------------------------------------------------------------------------------------------------------------------------------------------------------------------------------------------------------------------------------------------------------------------------------------------------------------------------------------------------------------------------------------------------------------------------------------------------------------------------------------------------------------------------------------------------------------------------------------------------------------------------------------------------------------------------------------------------------------------------------------------------------------------------------------------------------------------------------------------------------------------------------------------------------------------------------------------------------------------------------------------------------------------------------------------------------------------------------------------------------------------------------------------------------------------------------------------------------------------------------------------------------------------------------------------------------------------------------------------------------------------------------------------------------------------------------------------------------------------------------------------------------------------------------------------------------------------------------------------------------------------------------------------------------------------------------------------------------------------------------------------------------------------------------------------------------------------------------------------------------------------------------------------------------------------------------------------------------------------------------------------------------------------------------------------------------------------------------------------------------------------------------------------------------------------------------------------------------------------------------------------------------------------------------------------------------------------------------------------------------------------------------------------------------------------------------------------------------------------------------------------------------------------------------------------------------------------------------------------------------------------------------------------------------------------------------------------------------------------------------------------------------------------------------------------------------------------------------------------------------------------------------------------------------------------------------------------------------------------------------------------------------------------------------------------------------------------------------------------------------------------------------------------------------------------------------------------------------------------------------------------------------------------------------------------------------------------------------------------------------------------------------------------------------------------------------------------------------------------------------------------------------------------------------------------------------------------------------------------------------------------------------------------------------------------------------------------------------------------------------------------------------------------------------------------------------------------------------------------------------------------------------------------------------------------------------------------------------------------------------------------------------------------------------------------------------------------------------------------------------------------------------------------------------------------------------------------------------------------------------------------------------------------------------------------------------------------------------------------------------------------------------------------------------------------------------------------------------------------------------------------------------------------------------------------------------------------------------------------------------------------------------------------------------------------------------------------------------------------------------------------------------------------------------------------------------------------------------------------------------------------------------------------------------------------------------------------------------------------------------------------------------------------------------------------------------------------------------------------------------------------------------------------------------------------------------------------------------------------------------------------------------------------------------------------------------------------------------------------------------------------------------------------------------------------------------------------------------------------------------------------------------------------------------------------------------------------------------------------------------------------------------------------------------------------------------------------------------------------------------------------------------------------------------------------------------------------------------------------------------------------------------------------------------------------------------------------------------------------------------------------------------------------------------------------------------------------------------------------------------------------------------------------------------------------------------------------------------------------------------------------------------------------------------------------------------------------------------------------------------------------------------------------------------------------------------------------------------------------------------------------------------------------------------------------------------------------------------------------------------------------------------------------------------------------------------------------------------------------------------------------------------------------------------------------------------------------------------------------------------------------------------------------------------------------------------------------------------------------------------------------------------------------------------------------------------------------------------------------------------------------------------------------------------------------------------------------------------------------------------------------------------------------------------------------------------------------------------------------------------------------------------------------------------------------------------------------------------------------------------------------------------------------------------------------------------------------------------|
| sh4_SVIP AS<br>aattcACGCGTAAAAAAGGCTAGACTTTTTCATTAAATC<br>TCTTGAATTTAATGAAAAGTCTAGCCg<br>Scr_SVIP S<br>gatccGCGCAGAACAAATTCGTCCATTCAAGAGATGG<br>ACGAATTTGTTCTGCGTTTTTTACGCGTg<br>Scr_SVIP AS<br>aattcACGCGTAAAAAACGCAGAACAAATTCGTCCATC<br>TCTTGAATGGACGAATTTGTTCTGCGCg<br>q SVIP F AAAGAGCAAAGCTTGCAGAG<br>q SVIP R GAAACTGTCCACCTAAGTCCAC<br>q GAPDH F TGCACCACCAACTGCTTAGC<br>q GAPDH R GGCATGGACTGTGGTCATGAG<br>qSLC25A5 F CTACAAATCTGATGGATTAAGGG<br>qSLC25A5 R ATGATGTCAGTTCCTTTGCG<br>qSUCLG2 F CTGATCCTAAGGTTGAAGCCA<br>qSUCLG2 R CGCTGTTGTTGAGTATCTTCTG<br>qNDUFB8 F CCCTATCCTAGGACCCCAGA<br>qNDUFB8 R TCCACACGGTTCCTGTTGTA<br>qMT-CO2 F TTCATGATCACGCCCTCATA<br>qMT-CO2 R TAAAGGATGCGTAGGGATGG<br>qHM13 F CAGACATGCCTGAAACAATCA<br>qHM13 R GATTCCCAGCACGAAGAAAT<br>qREEP5 F CTTCATCGCTCTTGGTGTCA<br>qREEP5 R GGTCAGCCACTGGGTATCAT<br>qCD82 F TGAGGACTGGCCTGTGTACC<br>qCD82 R TTGGGACCTTGCTGTAGTC<br>qNSDHL F GACCTTCCCTATGCCATGAA<br>qNSDHL R CCAAGTTCTTCCCATTTC<br>qSLC2A1 F CATCAACGCTGTCTTCTATTACTC<br>qSLC2A1 R ATGCTCAGATAGGACATCCA | This paper<br><br>PMID: 28881673<br><br>PMID: 28881673<br><br>This paper<br>This paper |
|---------------------------------------------------------------------------------------------------------------------------------------------------------------------------------------------------------------------------------------------------------------------------------------------------------------------------------------------------------------------------------------------------------------------------------------------------------------------------------------------------------------------------------------------------------------------------------------------------------------------------------------------------------------------------------------------------------------------------------------------------------------------------------------------------------------------------------------------------------------------------------------------------------------------------------------------------------------------------------------------------------------------------------------------------|------------------------------------------------------------------------------------------------------------------------------------------------------------------------------------------------------------------------------------------------------------------------------------------------------------------------------------------------------------------------------------------------------------------------------------------------------------------------------------------------------------------------------------------------------------------------------------------------------------------------------------------------------------------------------------------------------------------------------------------------------------------------------------------------------------------------------------------------------------------------------------------------------------------------------------------------------------------------------------------------------------------------------------------------------------------------------------------------------------------------------------------------------------------------------------------------------------------------------------------------------------------------------------------------------------------------------------------------------------------------------------------------------------------------------------------------------------------------------------------------------------------------------------------------------------------------------------------------------------------------------------------------------------------------------------------------------------------------------------------------------------------------------------------------------------------------------------------------------------------------------------------------------------------------------------------------------------------------------------------------------------------------------------------------------------------------------------------------------------------------------------------------------------------------------------------------------------------------------------------------------------------------------------------------------------------------------------------------------------------------------------------------------------------------------------------------------------------------------------------------------------------------------------------------------------------------------------------------------------------------------------------------------------------------------------------------------------------------------------------------------------------------------------------------------------------------------------------------------------------------------------------------------------------------------------------------------------------------------------------------------------------------------------------------------------------------------------------------------------------------------------------------------------------------------------------------------------------------------------------------------------------------------------------------------------------------------------------------------------------------------------------------------------------------------------------------------------------------------------------------------------------------------------------------------------------------------------------------------------------------------------------------------------------------------------------------------------------------------------------------------------------------------------------------------------------------------------------------------------------------------------------------------------------------------------------------------------------------------------------------------------------------------------------------------------------------------------------------------------------------------------------------------------------------------------------------------------------------------------------------------------------------------------------------------------------------------------------------------------------------------------------------------------------------------------------------------------------------------------------------------------------------------------------------------------------------------------------------------------------------------------------------------------------------------------------------------------------------------------------------------------------------------------------------------------------------------------------------------------------------------------------------------------------------------------------------------------------------------------------------------------------------------------------------------------------------------------------------------------------------------------------------------------------------------------------------------------------------------------------------------------------------------------------------------------------------------------------------------------------------------------------------------------------------------------------------------------------------------------------------------------------------------------------------------------------------------------------------------------------------------------------------------------------------------------------------------------------------------------------------------------------------------------------------------------------------------------------------------------------------------------------------------------------------------------------------------------------------------------------------------------------------------------------------------------------------------------------------------------------------------------------------------------------------------------------------------------------------------------------------------------------------------------------------------------------------------------------------------------------------------------------------------------------------------------------------------------------------------------------------------------------------------------------------------------------------------------------------------------------------------------------------------------------------------------------------------------------------------------------------------------------------------------------------------------------------------------------------------------------------------------------------------------------------------------------------------------------------------------------------------------------------------------------------------------------------------------------------------------------------------------------------------------------------------------------------------------------------------------------------------------------------------------------------------------------------------------------------------------------------------------------------------------------------------------------------------------------------------------------------------------------------------------------------------------------------------------------------------------------------------------------------------------------------------------------------------------------------------------------------------------------------------------------------------------------------------------------------------------------------------------------------------------------------------------------------------------------------------------------------------------------------------------------------------------------------------------------------------------------------------------------------------------------------------------------------------------------------------------------------------------------------------------------------------------------------------------------------------------------------------------------------------------------------------------------------------------------------------------------------------------------------------------------------------------------------------------------------------------------------------------------------------------------------------------------------------------------------------------------------------------------------------------------------------------------------------------------------------------------------------------------------------------------------------------------------------------------------------------------------------------------------------------------------------------------------------------------------------------------------------------------------------------------------------------------------------------------------------------------------------------------------------------------------------------------------------------------------------------------------------------------------------------------------------------------------------------------------------------------------------------------------------------------------------------------------------------------------------------------------------------------------------------------------------------------------------------------------------------------------------------------------------------------------------------------------------------------------------------------------------------------------------------------------------------------------------------------------------------------------------------------------------------------------------------------------------------------------------------------------------------------------------------------------------------------------------------------------------------------------------------------------------------------------------------------------------------------------------------------------------------------------------------------------------------------------------------------------------------------------------------------------------------------------------------------------------------------------------------------------------------------------------------------------------------------------------------------------------------------------------------------------------------------------------------------------------------------------------------------------------------------------------------------------------------------------------------------------------------------------------------------------------------------------------------------------------------------------------------------------------------------------------------------------------------------------------------------------------------------------------------------------------------------------------------------------------------------------------------------------------------------------------------------------------------------------------------------------------------------------------------------------------------------------------------------------------------------------------------------------------------------------------------------------------------------------|
